# Supplementary material
Source: MDPI journal article supplement (https://www.mdpi.com/2073-4344/13/6/1003)
Supplement: s1 [file s1]

# Green approach for Synthesizing Copper-containing ZIFs as efficient catalysts for Green Click chemistry

Alireza Pourvahabi Anbari <sup>1,2</sup>, Shima Rahmdel Delcheh <sup>3</sup>, Philippe M. Heynderickx<sup>2,6</sup>, Somboon Chaemcheun <sup>5</sup>, Serge Zhuiykov <sup>2,4</sup>, Francis Verpoort <sup>5,7,\*</sup>

<sup>1</sup> Department of Chemistry, Faculty of Science, Ghent University, 9000 Ghent, Belgium

<sup>2</sup> Center for Environmental and Energy Research (CEER), Ghent University Global Campus, Incheon, 406-840, South Korea

<sup>3</sup> Department of Chemistry, Guilan University, Rasht, Iran

<sup>4</sup> Department of Solid-State Sciences, Faculty of Science, Ghent University, 9000 Ghent, Belgium

<sup>5</sup> State Key Laboratory of Advanced Technology for Materials Synthesis and Processing, Wuhan University of Technology, Wuhan 430070, China

<sup>6</sup> Department of Green Chemistry and Technology, Faculty of Bioscience Engineering, Ghent University, Coupure Links 653, Ghent, B-9000, Belgium

<sup>7</sup> National Research Tomsk Polytechnic University, Lenin Avenue 30, 634050 Tomsk, Russian Federation

Corresponding author: Francis Verpoort; email: francis@whut.edu.cn

## Contents

|                                                                                                                                         |   |
|-----------------------------------------------------------------------------------------------------------------------------------------|---|
| Figure S1: IR pattern for Cu <sub>10%</sub> -ZIF-8.....                                                                                 | 3 |
| Figure S2: IR pattern for Cu <sub>20%</sub> -ZIF-67.....                                                                                | 3 |
| Figure S3: <sup>1</sup> H NMR of 1-benzyl-4-phenyl-1H-1,2,3-triazole (product) from reaction catalyst by Cu <sub>10%</sub> -ZIF-8.....  | 4 |
| Figure S4: <sup>13</sup> C NMR of 1-benzyl-4-phenyl-1H-1,2,3-triazole (product) from reaction catalyst by Cu <sub>10%</sub> -ZIF-8..... | 5 |

|                                                                                                                                                                                                                                                                                                                                                                                                                                       |                                     |
|---------------------------------------------------------------------------------------------------------------------------------------------------------------------------------------------------------------------------------------------------------------------------------------------------------------------------------------------------------------------------------------------------------------------------------------|-------------------------------------|
| Figure S5: $^1\text{H}$ NMR of 1-benzyl-4-phenyl-1H-1,2,3-triazole (product) from reaction catalyst by $\text{Cu}_{20\%}\text{-ZIF-67}$ .....                                                                                                                                                                                                                                                                                         | 6                                   |
| Figure S6: $^{13}\text{C}$ NMR of 1-benzyl-4-phenyl-1H-1,2,3-triazole (product) from reaction catalyst by $\text{Cu}_{10\%}\text{-ZIF-67}$ .....                                                                                                                                                                                                                                                                                      | 7                                   |
| Table S1: Applying different types of Organic halides and Azides to achieve 1,2,3 triazoles and its derivatives.....                                                                                                                                                                                                                                                                                                                  | 8                                   |
| Figure S7. The color change with different percentage of Cu (a) ZIF-67 (b) $\text{Cu}_{10}\text{ZIF-67}$ (c) $\text{Cu}_{20}\text{ZIF-67}$ (d) $\text{Cu}_{30}\text{ZIF-67}$ (e) $\text{Cu}_{40}\text{ZIF-67}$ (f) $\text{Cu}_{50}\text{ZIF-67}$ (g) ZIF-8 (h) $\text{Cu}_{10}\text{ZIF-8}$ (i) $\text{Cu}_{20}\text{ZIF-8}$ (j) $\text{Cu}_{30}\text{ZIF-8}$ (k) $\text{Cu}_{40}\text{ZIF-8}$ (l) $\text{Cu}_{50}\text{ZIF-8}$ ..... | 10                                  |
| Figure S 8. $\text{N}_2$ adsorption/desorption curves for Cu-ZIF-8 and Cu-ZIF-67 materials with different amount of copper (b) $\text{Cu}_{20}\text{ZIF-8}$ , (c) $\text{Cu}_{30}\text{ZIF-8}$ , (d) $\text{Cu}_{40}\text{ZIF-8}$ , (e) $\text{Cu}_{50}\text{ZIF-8}$ , (f) $\text{Cu}_{10}\text{ZIF-67}$ , (h) $\text{Cu}_{30}\text{ZIF-67}$ , (i) $\text{Cu}_{40}\text{ZIF-67}$ , (j) $\text{Cu}_{50}\text{ZIF-67}$ .....            | 11                                  |
| Table S2: Porosity and surface area of $\text{Cu}_x\text{ZIF-8}$ and $\text{Cu}_x\text{ZIF-67}$ samples.....                                                                                                                                                                                                                                                                                                                          | <b>Error! Bookmark not defined.</b> |
| Figure S9. Energy dispersive spectrometry (EDS) mapping of $\text{Cu}_{20}\text{ZIF-67}$ obtained by the IST approach.....                                                                                                                                                                                                                                                                                                            | 13                                  |
| Figure S10. Graphical abstract.....                                                                                                                                                                                                                                                                                                                                                                                                   | 14                                  |

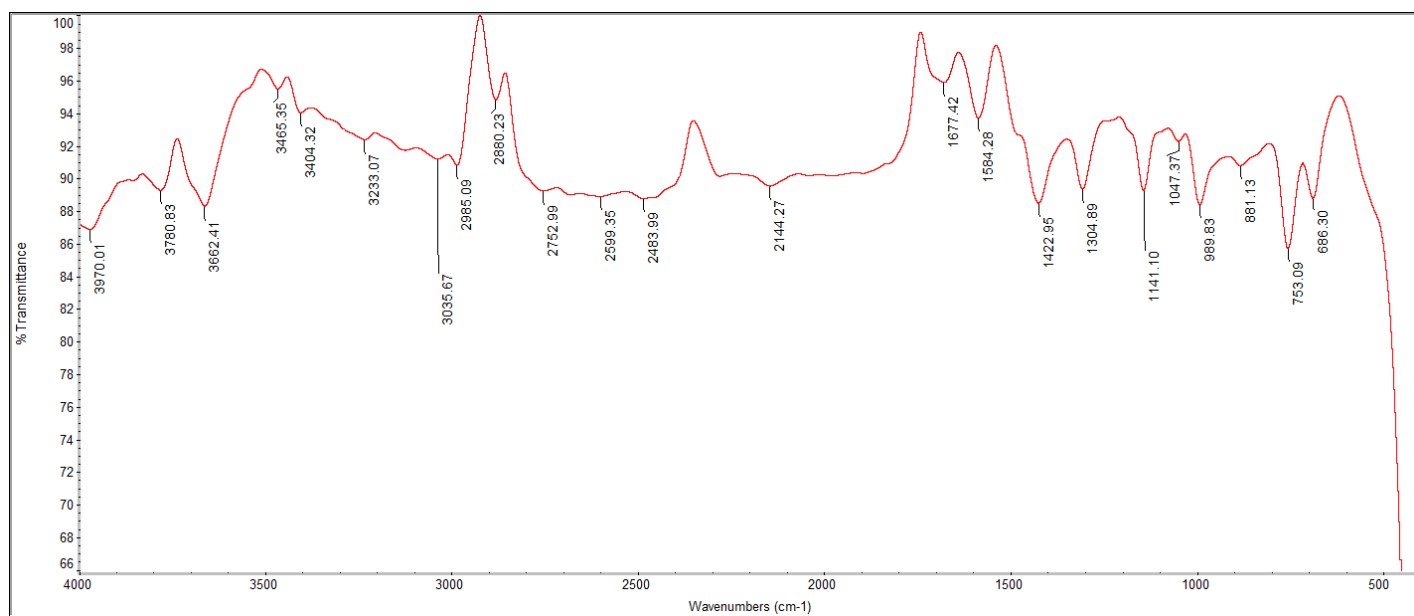

Figure S1: IR pattern for Cu<sub>10</sub>-ZIF-8

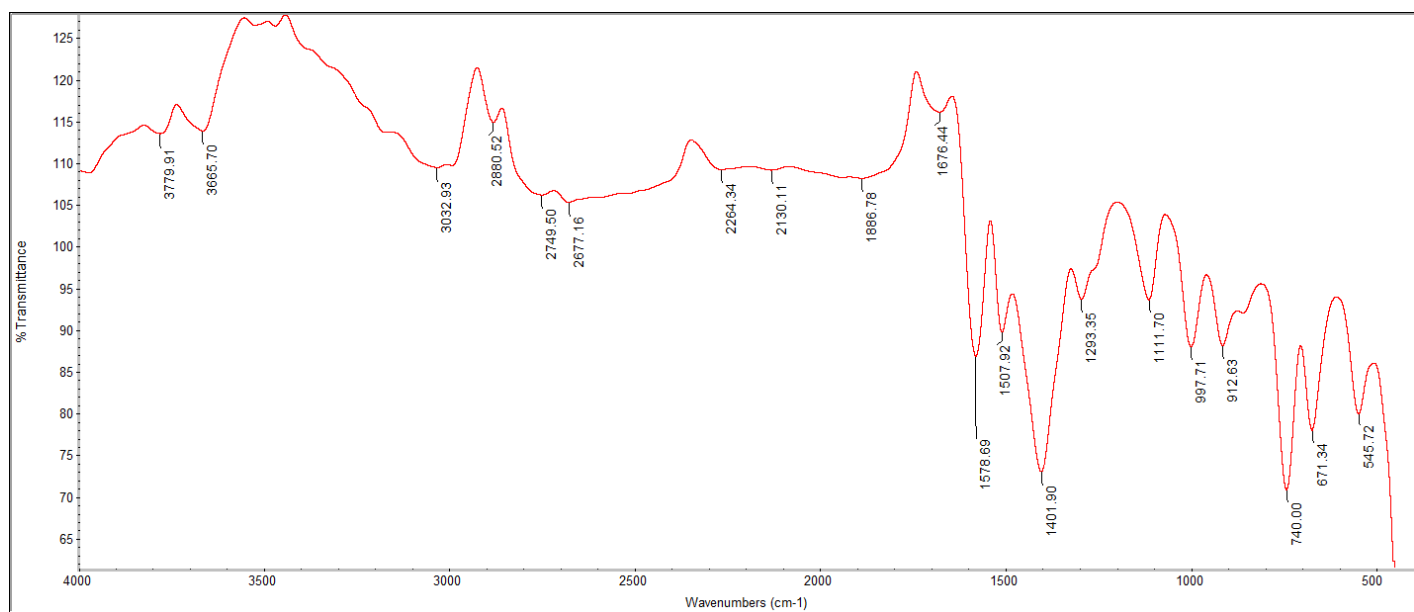

Figure S2: IR pattern for Cu<sub>20</sub>-ZIF-67

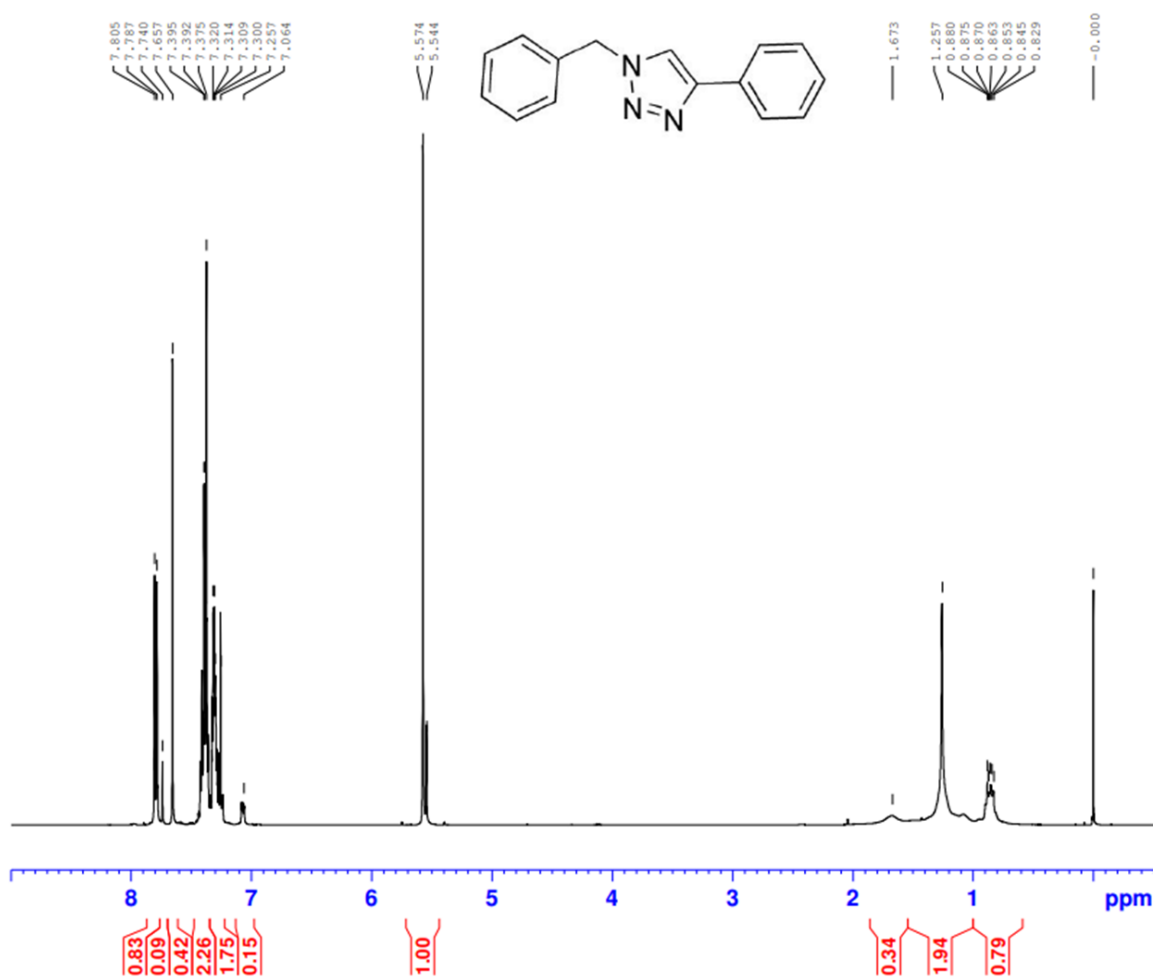

Figure S3: <sup>1</sup>H NMR of 1-benzyl-4-phenyl-1H-1,2,3-triazole (product) from reaction catalyst by Cu<sub>10</sub>-ZIF-8

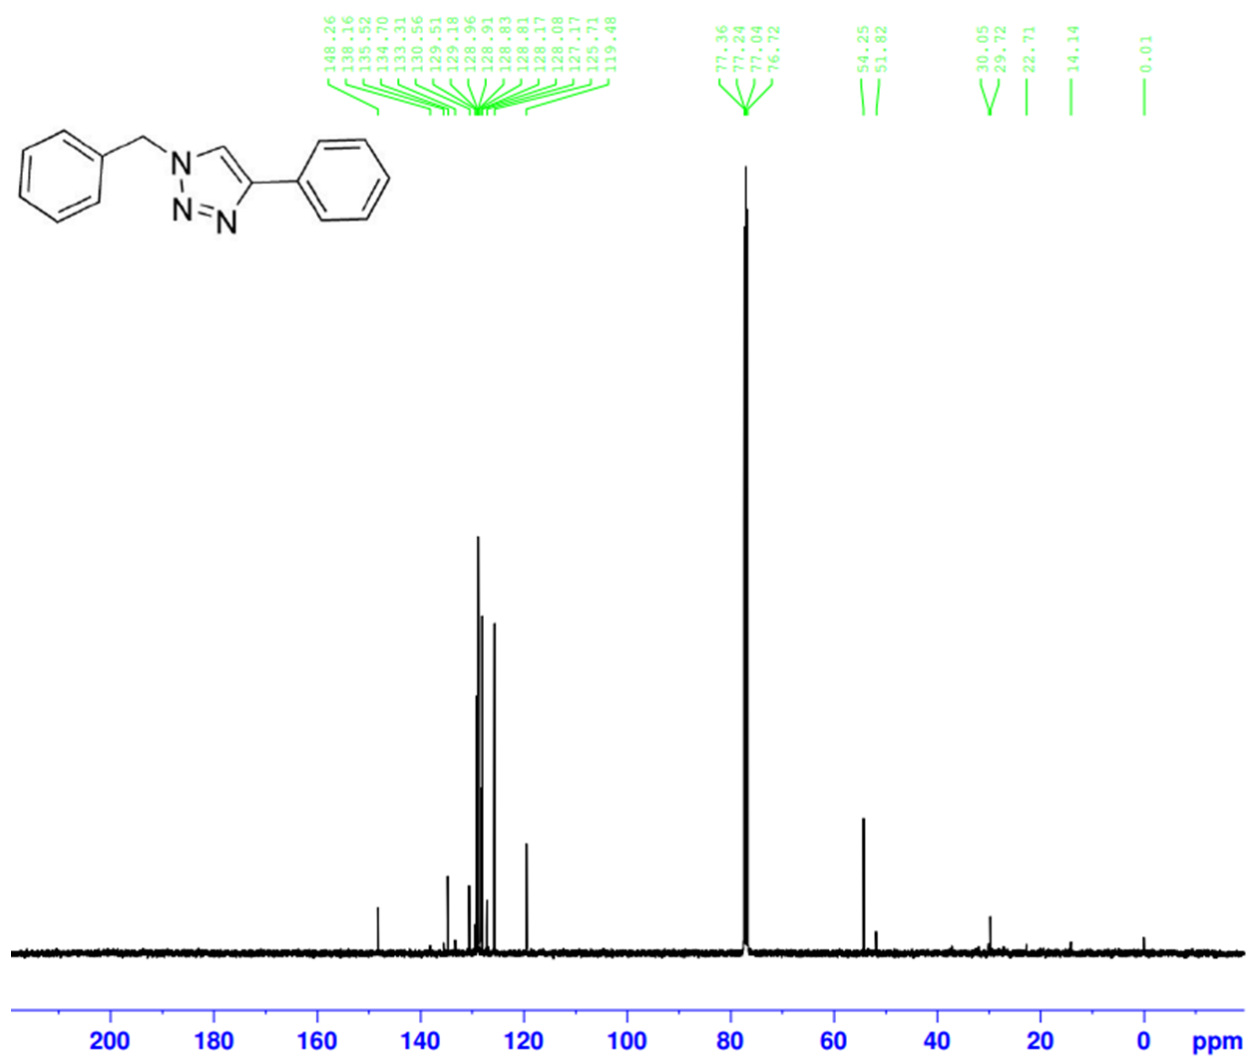

Figure S4: <sup>13</sup>C NMR of 1-benzyl-4-phenyl-1H-1,2,3-triazole (product) from reaction catalyst by Cu<sub>10</sub>-ZIF-8

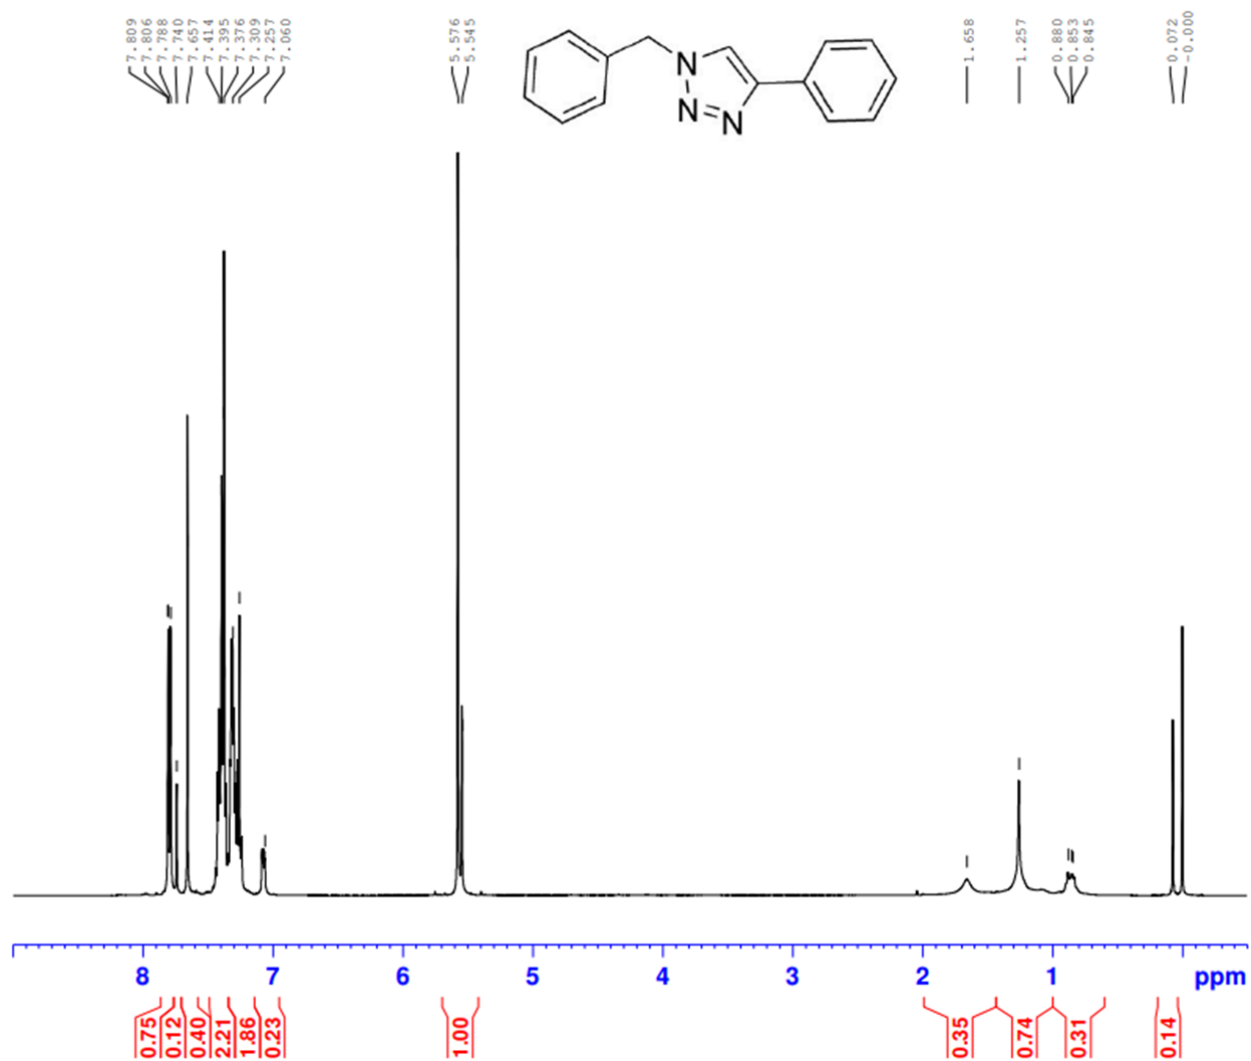

Figure S5: <sup>1</sup>H NMR of 1-benzyl-4-phenyl-1H-1,2,3-triazole (product) from reaction catalyst by Cu<sub>20</sub>-ZIF-67

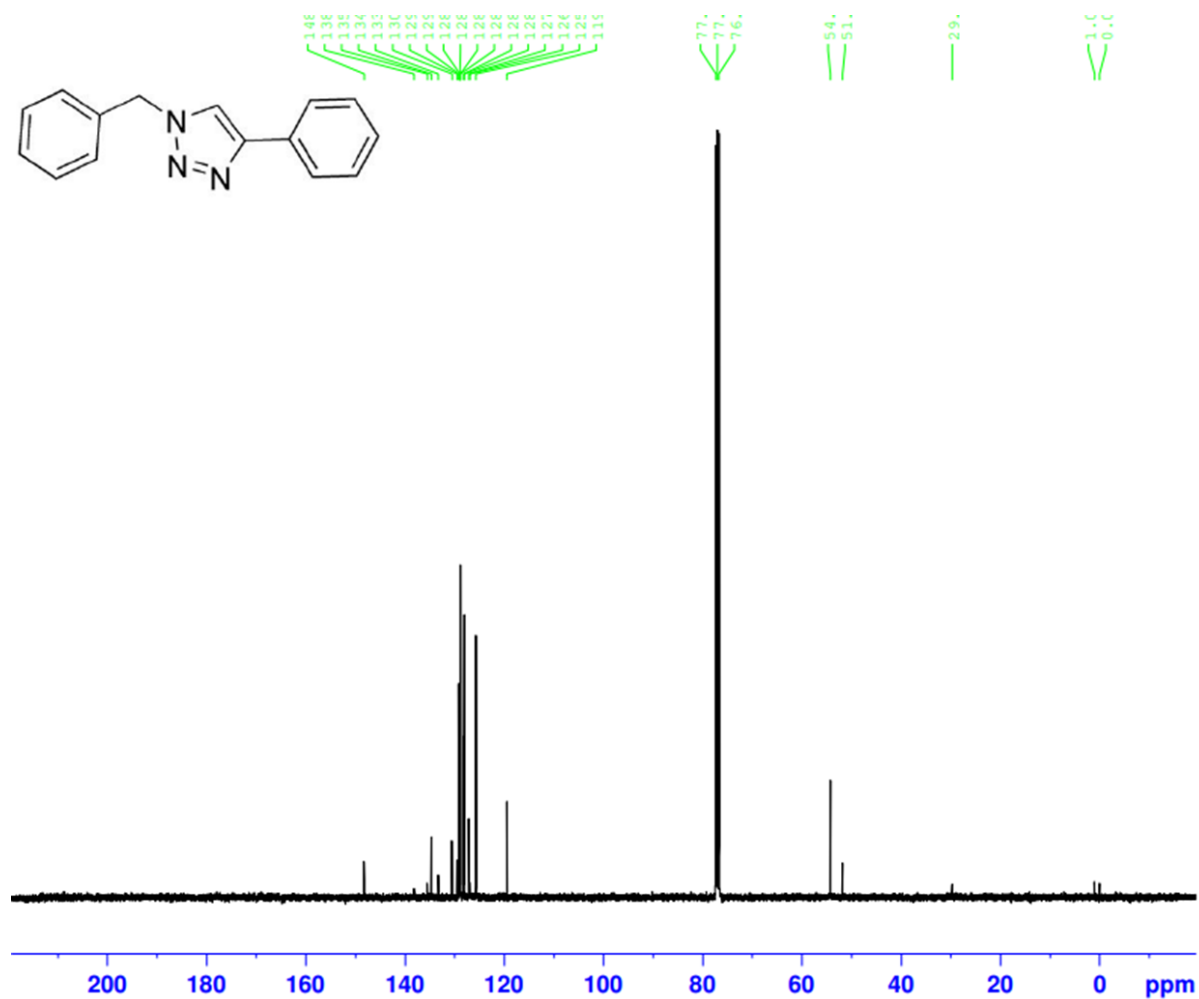

Figure S6: <sup>13</sup>C NMR of 1-benzyl-4-phenyl-1H-1,2,3-triazole (product) from reaction catalyst by Cu<sub>10</sub>-ZIF-67

|   | product                                                                             | Organic halides                                                                     | Alkynes                                                                               | Yield |
|---|-------------------------------------------------------------------------------------|-------------------------------------------------------------------------------------|---------------------------------------------------------------------------------------|-------|
| 1 | 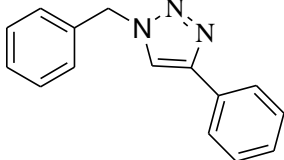   |    |    | 99    |
| 2 |    |    |    | 94    |
| 3 |    |    |    | 83    |
| 4 |   |    |    | 91    |
| 5 |  |  |  | 96    |
| 6 |  |  |  | 96    |
| 7 |  |  | $(\text{HO})\text{CH}_2-\text{C}\equiv\text{CH}$                                      | 55    |
| 8 |  |  | $(\text{HO})\text{CH}_2(\text{CH}_3)-\text{C}\equiv\text{CH}$                         | 67    |



|           |  |  |  |    |
|-----------|--|--|--|----|
| <b>9</b>  |  |  |  | 97 |
| <b>10</b> |  |  |  | 95 |
| <b>11</b> |  |  |  | 96 |
| <b>12</b> |  |  |  | 81 |
| <b>13</b> |  |  |  | 65 |
| <b>14</b> |  |  |  | 59 |
| <b>15</b> |  |  |  | 63 |
| <b>16</b> |  |  |  | 74 |

|    |                                                                                   |                                                                                   |                                                                 |    |
|----|-----------------------------------------------------------------------------------|-----------------------------------------------------------------------------------|-----------------------------------------------------------------|----|
| 17 | 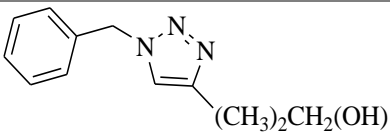 |  | $(\text{HO})(\text{CH}_3)_2\text{CH}_2-\text{C}\equiv\text{CH}$ | 78 |
|----|-----------------------------------------------------------------------------------|-----------------------------------------------------------------------------------|-----------------------------------------------------------------|----|

Table S1: Applying different types of Organic halides and Azides to achieve 1,2,3 triazoles and its derivatives.

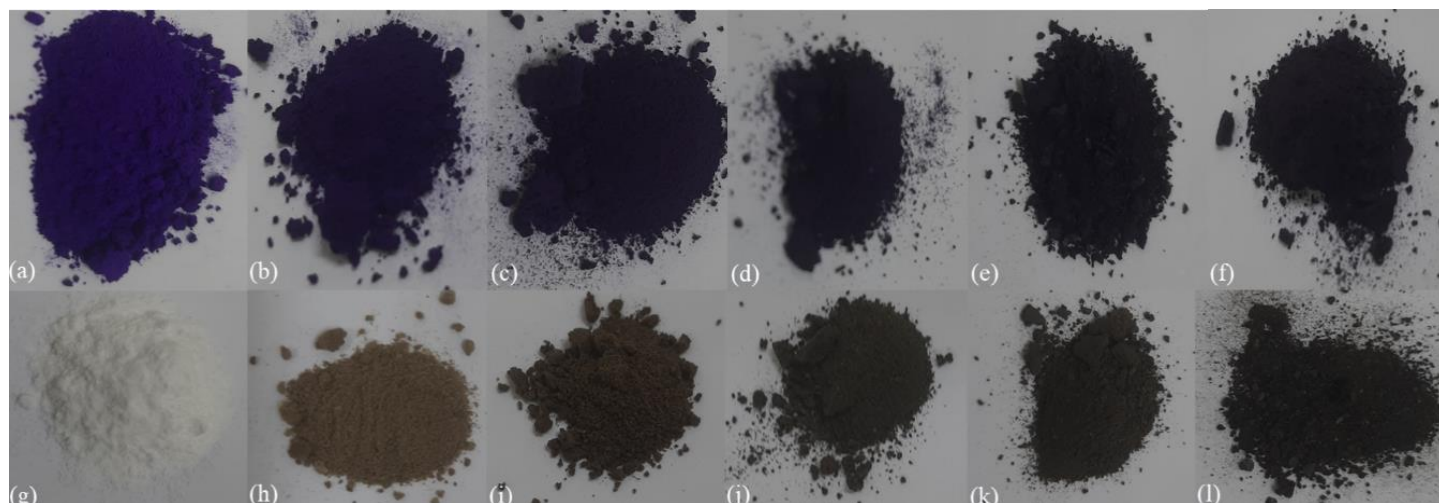

**Figure S7.** The color change with different percentage of Cu (a) ZIF-67 (b)  $\text{Cu}_{10}\text{ZIF-67}$  (c)  $\text{Cu}_{20}\text{ZIF-67}$  (d)  $\text{Cu}_{30}\text{ZIF-67}$  (e)  $\text{Cu}_{40}\text{ZIF-67}$  (f)  $\text{Cu}_{50}\text{ZIF-67}$  (g) ZIF-8 (h)  $\text{Cu}_{10}\text{ZIF-8}$  (i)  $\text{Cu}_{20}\text{ZIF-8}$  (j)  $\text{Cu}_{30}\text{ZIF-8}$  (k)  $\text{Cu}_{40}\text{ZIF-8}$  (l)  $\text{Cu}_{50}\text{ZIF-8}$

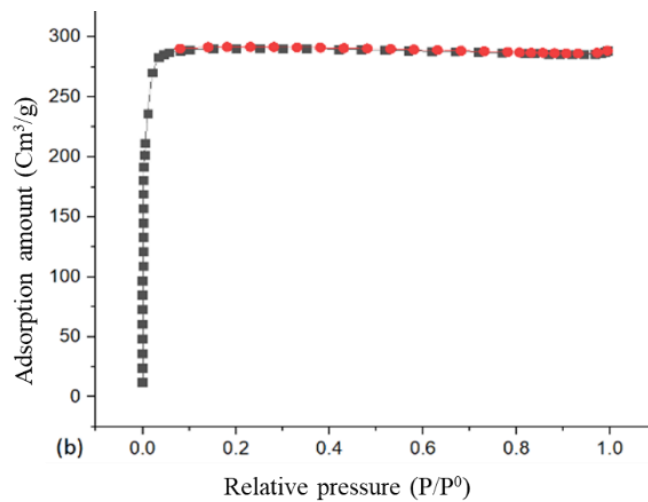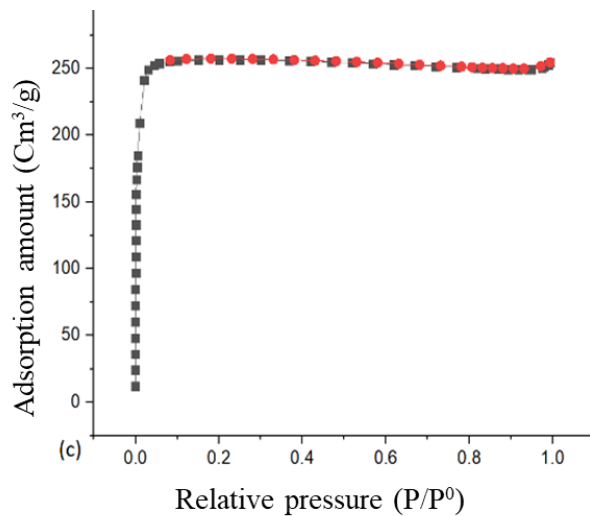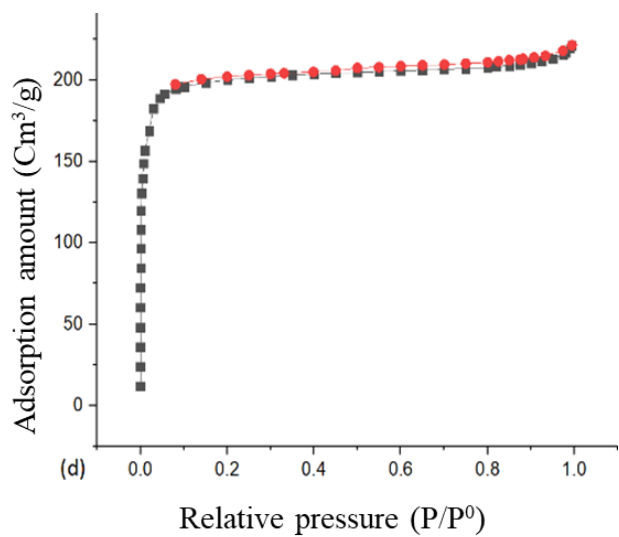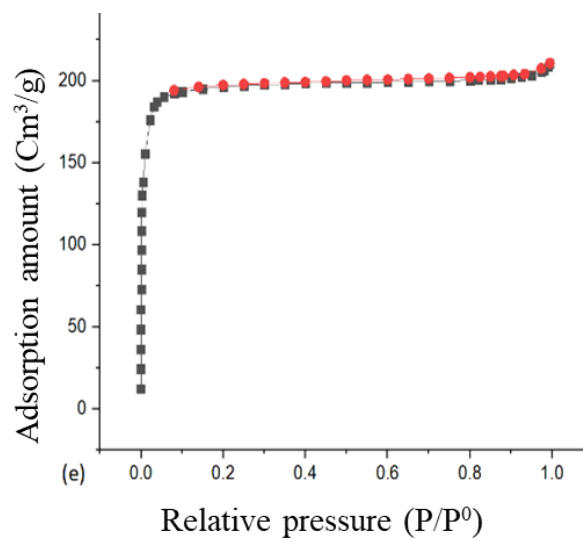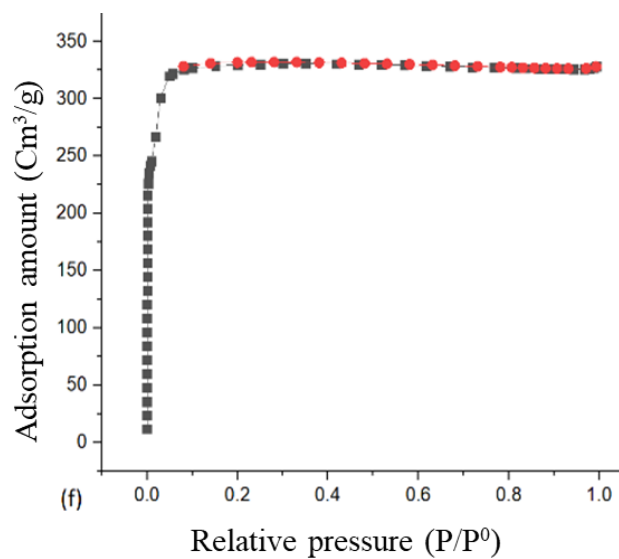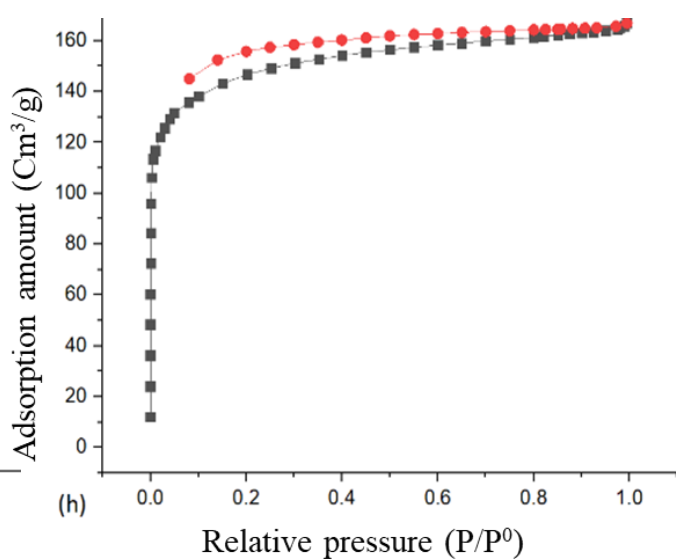

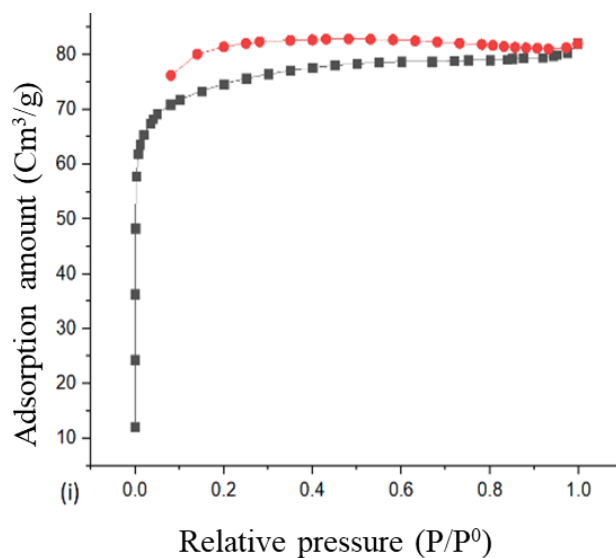

**Figure S 8.** N<sub>2</sub> adsorption/desorption curves for Cu-ZIF-8 and Cu-ZIF-67 materials with different amount of copper  
 (b) Cu<sub>20</sub>ZIF-8, (c) Cu<sub>30</sub>ZIF-8, (d) Cu<sub>40</sub>ZIF-8, (e) Cu<sub>50</sub>ZIF-8, (f) Cu<sub>10</sub>ZIF-67, (h) Cu<sub>30</sub>ZIF-67, (i) Cu<sub>40</sub>ZIF-67, (j) Cu<sub>50</sub>ZIF-67

| sample                  | BET     | Langmuir | Pore size (nm) | Pore volume<br>(cm <sup>3</sup> .g <sup>-1</sup> ) |
|-------------------------|---------|----------|----------------|----------------------------------------------------|
| Cu <sub>20</sub> ZIF-8  | 1248.80 | 1328.26  | 1.429          | 0.446                                              |
| Cu <sub>30</sub> ZIF-8  | 1102.68 | 1173.18  | 1.427          | 0.393                                              |
| Cu <sub>40</sub> ZIF-8  | 831.62  | 885.43   | 1.647          | 0.342                                              |
| Cu <sub>50</sub> ZIF-8  | 834.25  | 881.79   | 1.562          | 0.325                                              |
| Cu <sub>10</sub> ZIF-67 | 1429.04 | 1562.15  | 1.420          | 0.508                                              |
| Cu <sub>30</sub> ZIF-67 | 562.90  | 607.94   | 1.834          | 0.256                                              |
| Cu <sub>40</sub> ZIF-67 | 286.20  | 313.10   | 1.744          | 0.126                                              |
| Cu <sub>50</sub> ZIF-67 | 277.73  | 299.93   | 1.667          | 0.115                                              |

Table S2: Porosity and surface area of Cu<sub>x</sub>ZIF-8 and Cu<sub>x</sub>ZIF-67 samples

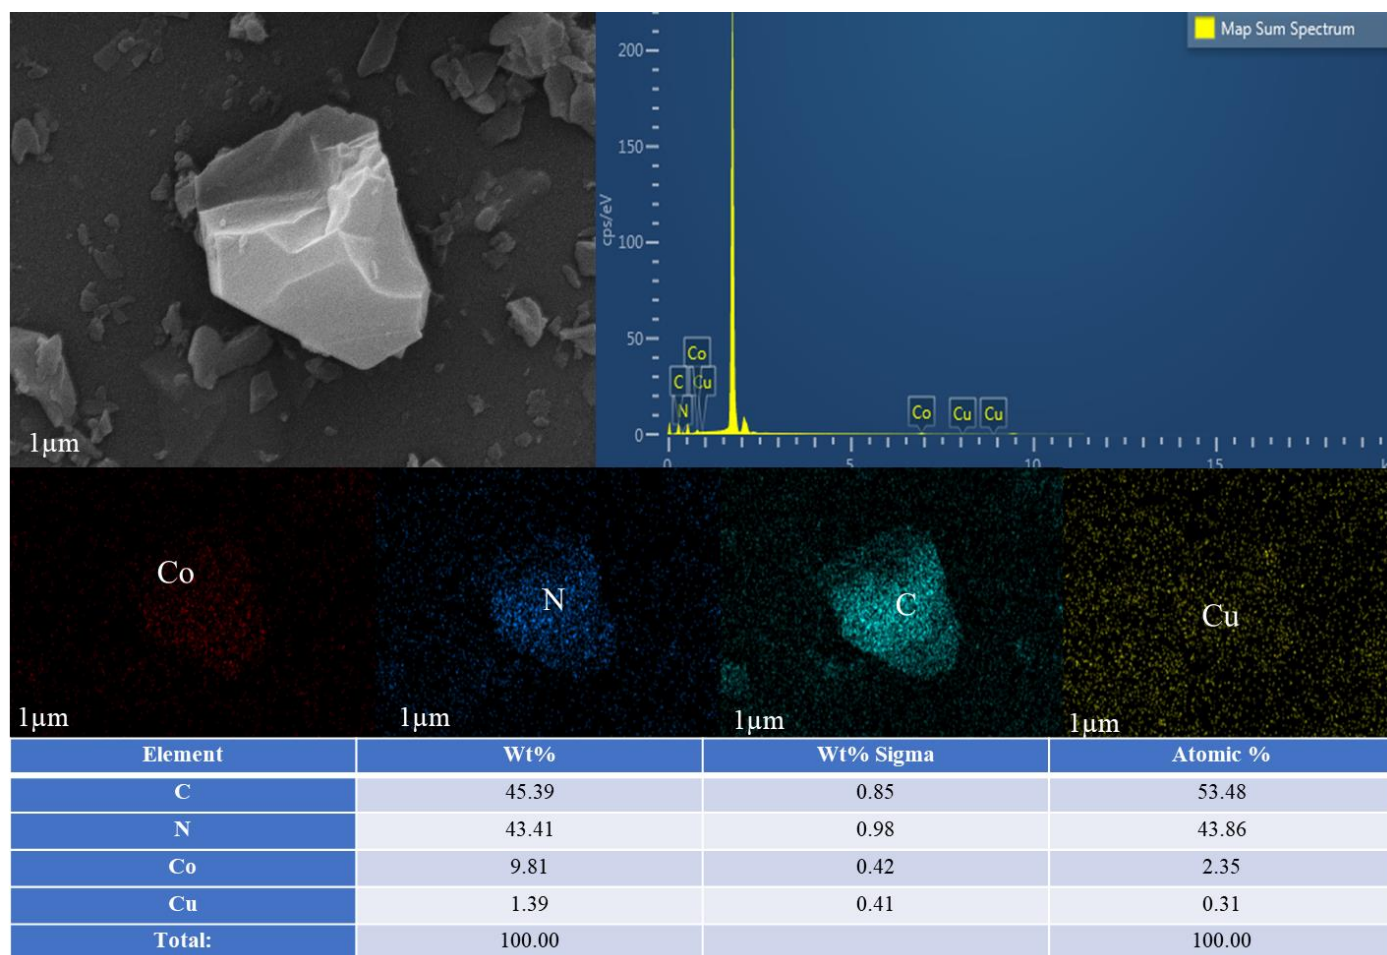

**Figure S9.** Energy dispersive spectrometry (EDS) mapping of  $\text{Cu}_{20}\text{ZIF-67}$  obtained by the IST approach
